# Supplementary material for: Self- and dis-assembly behavior of segmented wormlike nanostructures from an ABC triblock copolymer
Source: Royal Society of Chemistry journal article supplement (doi:10.1039/d1ra04580f), 2021-01-01
Supplement: d1ra04580f1.pdf [file d1ra04580f1.pdf]

Supporting Information for:

# Self- and dis-assembly behavior of segmented wormlike nanostructures from ABC triblock copolymer

Supporting figures

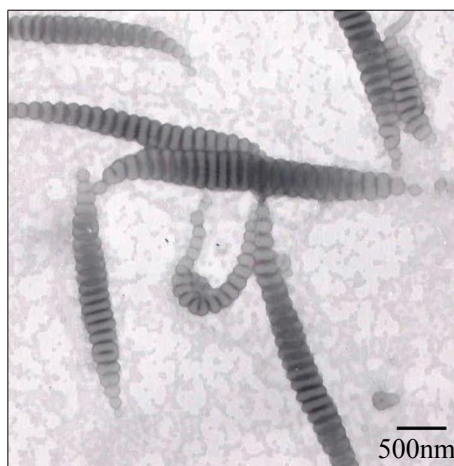

**Figure S1.** Segmented wormlike nanostructures prepared from  $\text{PS}_{720}\text{-b-P2VP}_{200}\text{-b-PEO}_{363}$  in THF/water after stirred for four days. The initial copolymer concentration is 1.0 wt %, water concentration is 13 wt %.

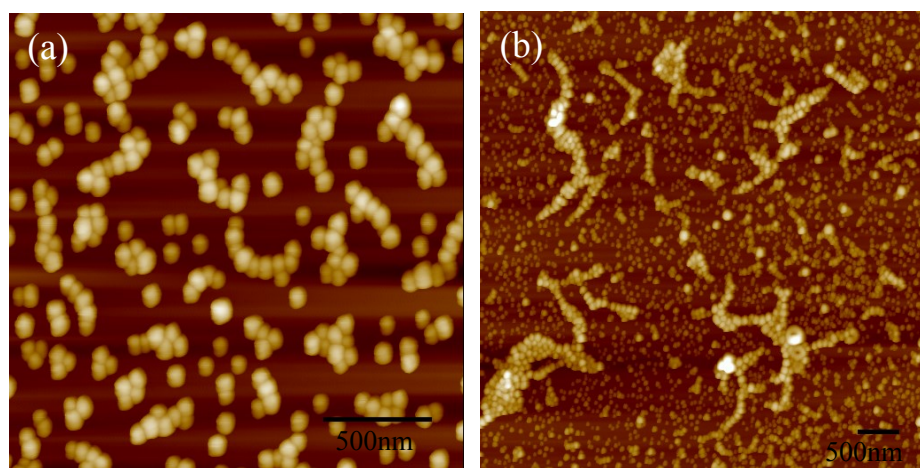

**Figure S2.** (a) Spherical micelles prepared from  $\text{PS}_{432}\text{-b-P2VP}_{152}\text{-b-PEO}_{193}$  in THF/water solutions. All the systems have an initial copolymer concentration of 1.0 wt %, and a water concentration of 13 wt %; (b) Giant aggregates formed from 1.0 wt %  $\text{PS}_{720}\text{-b-P2VP}_{200}\text{-b-PEO}_{375}$  in THF/water.

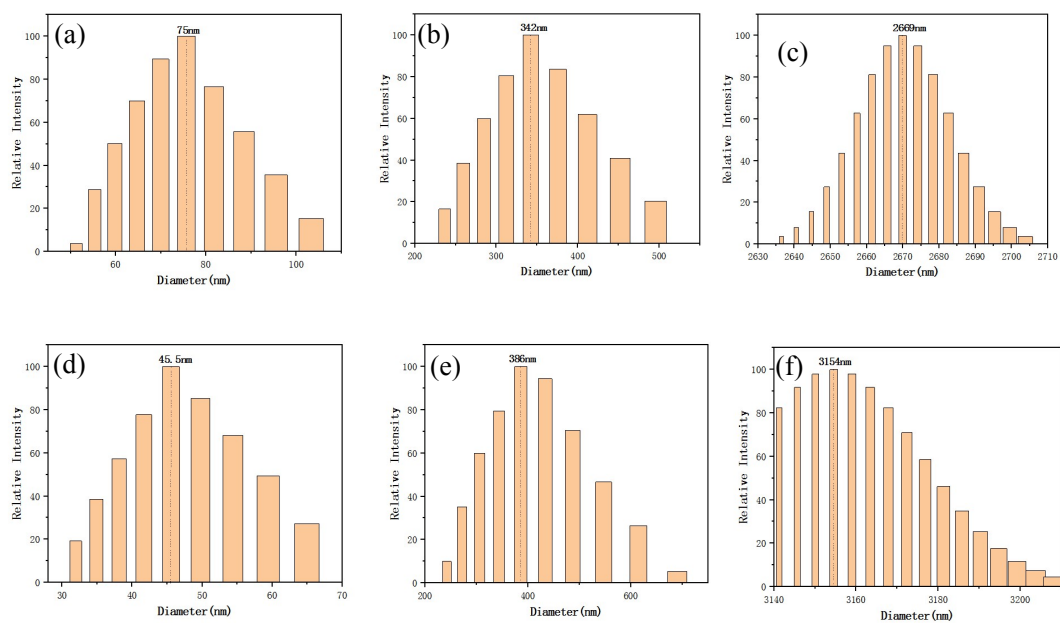

**Figure S3.** Dynamic light scattering results of the self-assembled structures from PS<sub>720</sub>-*b*-P2VP<sub>200</sub>-*b*-PEO<sub>363</sub> for (a) 24 h; (b) 48 h; (c) 96 h; and from PS<sub>768</sub>-P2VP<sub>133</sub>-PEO<sub>95</sub> for (d) 20 h; (e) 50 h; (f) 96 h at room temperature (20°C), in THF/H<sub>2</sub>O mixtures (water content: 13 wt %).

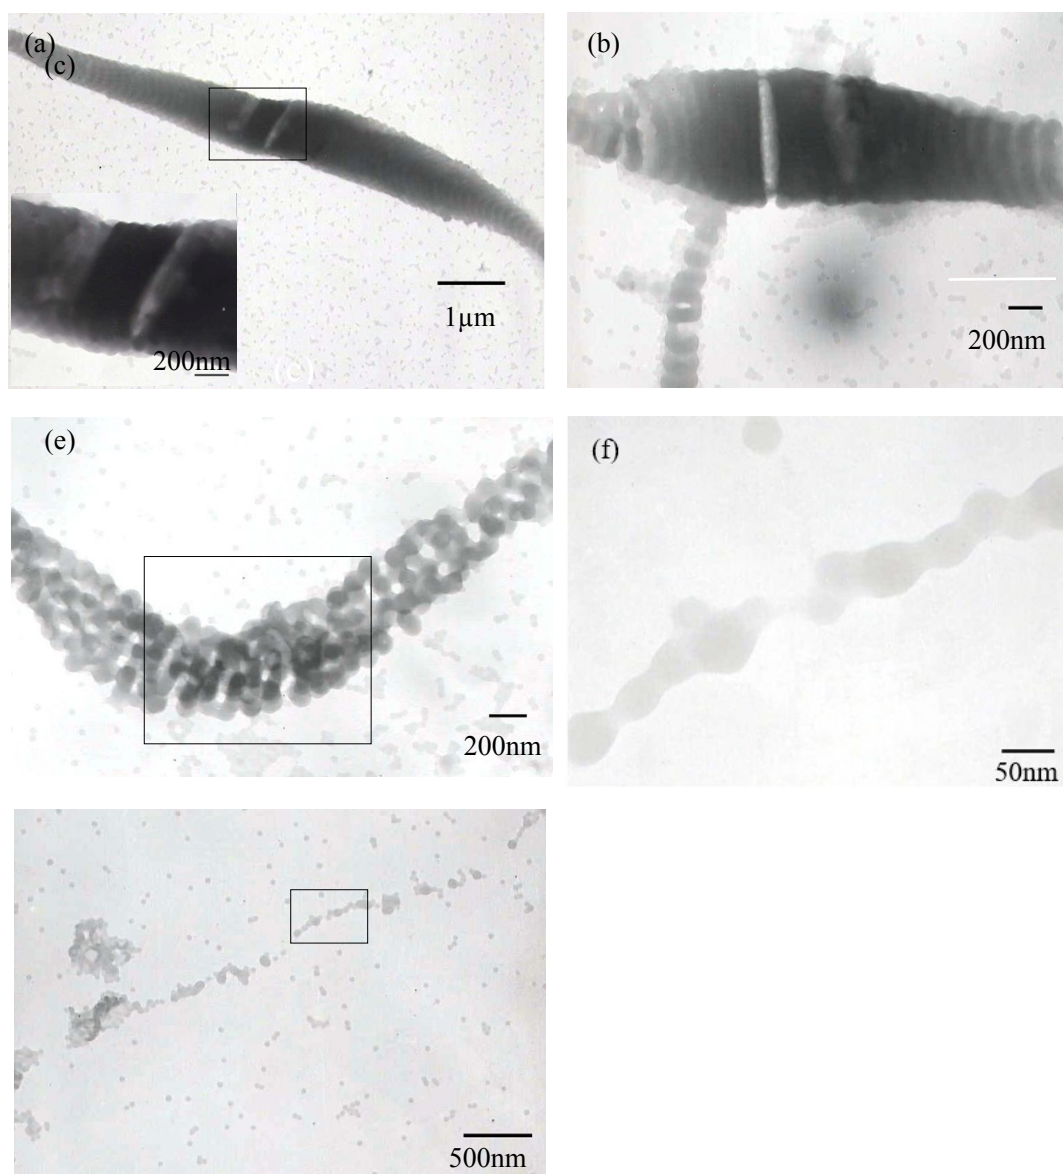

**Figure S4.** Intermediate structures captured at different temperatures from the  $PS_{720}\text{-}b\text{-}P2VP_{200}\text{-}b\text{-}PEO_{363}$  in THF/water: (a) and (b) 30°C, insert picture is the local magnification; (c) 40°C; (d) is the local magnification of (c); (e) 55°C; (f) is the local magnification of (e). The initial copolymer concentration is 1.0 wt %, water concentration is 13 wt %.
